# Supplementary material for: A curcumin-nicotinoyl derivative and its transition metal complexes: synthesis, characterization, andin silicoandin vitrobiological behaviors
Source: Royal Society of Chemistry journal article supplement (doi:10.1039/d3dt01351k), 2023-01-01
Supplement: d3dt01351k1.pdf [file d3dt01351k1.pdf]

## Electronic Supporting Information

### **Curcumin-nicotinoyl derivative and its transitional metal complexes: synthesis, characterization, *in silico* and *in vitro* selective anticancer, and anti-bacterial behaviors**

Marziyeh-Sadat Hosseini,<sup>ab</sup> Hassan Hadadzadeh,<sup>\*a</sup> Seyede Zohreh Mirahmadi-Zare,<sup>\*b</sup> Hossein Farrokhpour,<sup>a</sup> Fatemeh Aboutalebi<sup>b</sup> and Dina Morshedi<sup>c</sup>

<sup>a</sup> Department of Chemistry, Isfahan University of Technology, Isfahan 84156-83111, Iran.

<sup>b</sup> Department of Animal Biotechnology, Reproductive Biomedicine Research Center, Royan Institute for Biotechnology, ACECR, 8159358686, Isfahan, Iran.

<sup>c</sup> Department of Industrial and Environmental Biotechnology, National Institute of Genetic Engineering and Biotechnology, 14965-161, Tehran, Iran.

\*Corresponding Authors: [hadad@iut.ac.ir](mailto:hadad@iut.ac.ir); [mirahmadi\\_zare@royaninstitute.org](mailto:mirahmadi_zare@royaninstitute.org)

- Table S1 DFT analysis of the most probable structures of Cu(II) and Zn(II) complexes.
- Fig. S1 FT-IR spectra of (a) curcumin, (b) Cur-Nic, (c) Cu(II) complex, and (d) Zn(II) complex.
- Fig. S2 MS spectrum of Cur-Nic.
- Scheme S1 Proposed fragmentation pathways of (A) curcumin and (B) Cur-Nic.
- Fig. S3 optimized structure of (A) Cur-Nic, (B) Cu(II) complex, and (C) Zn(II) complex.

**Table S1** DFT analysis of the most probable structures of Cu(II) and Zn(II) complexes

| Energy (kcal/mol)        | Structure                                                                            |
|--------------------------|--------------------------------------------------------------------------------------|
| $-3.171 \times 10^{-19}$ | 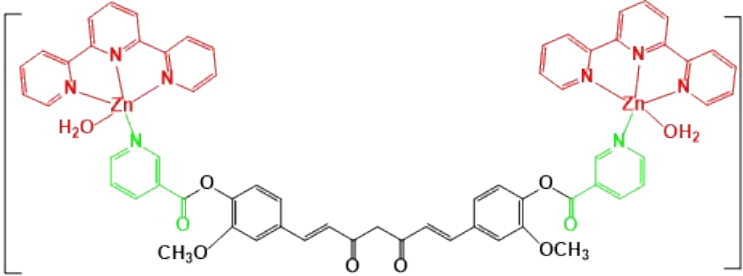   |
| $-2.654 \times 10^{-19}$ |    |
| $-1.735 \times 10^{-16}$ |   |
| $-1.247 \times 10^{-16}$ |  |

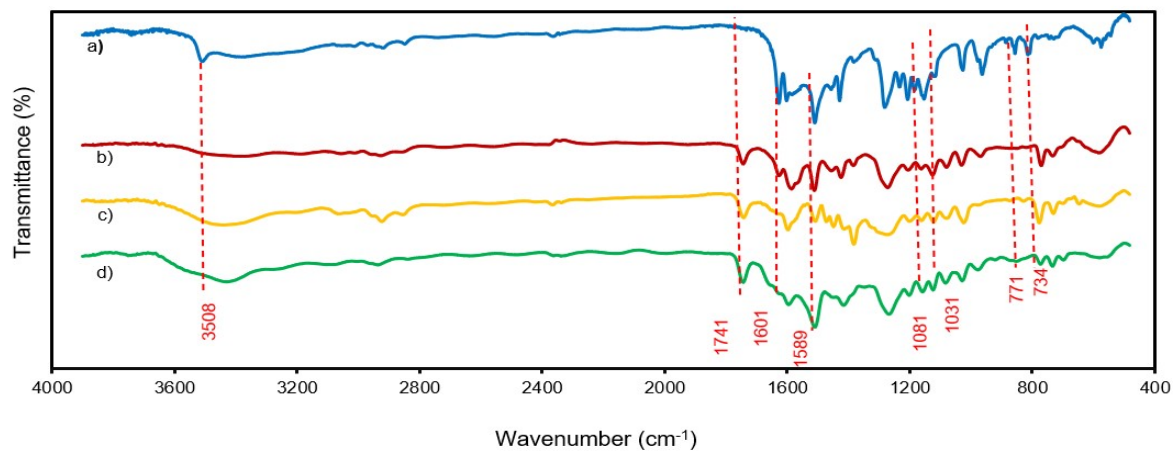

**Fig. S1** FT-IR spectra of (a) curcumin, (b) Cur-Nic, (c) Cu(II) complex, and (d) Zn(II) complex.

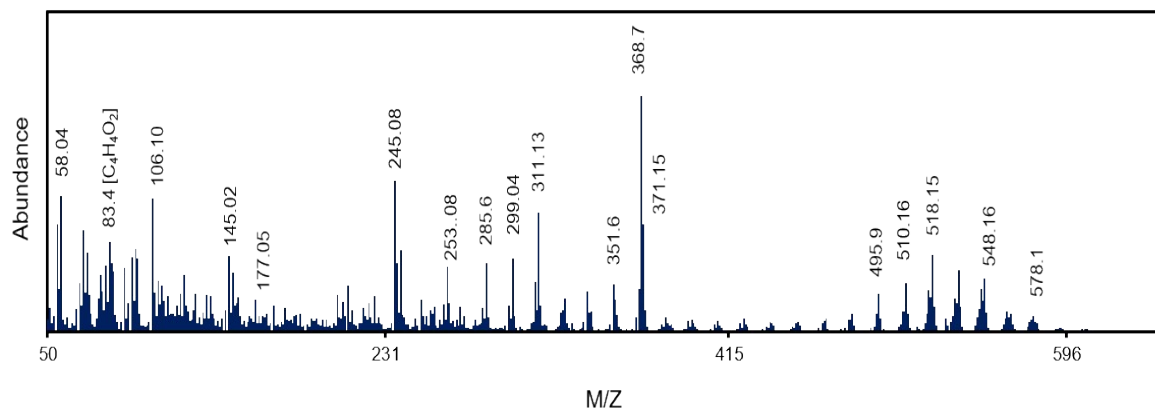

**Fig. S2** MS spectrum of Cur-Nic.

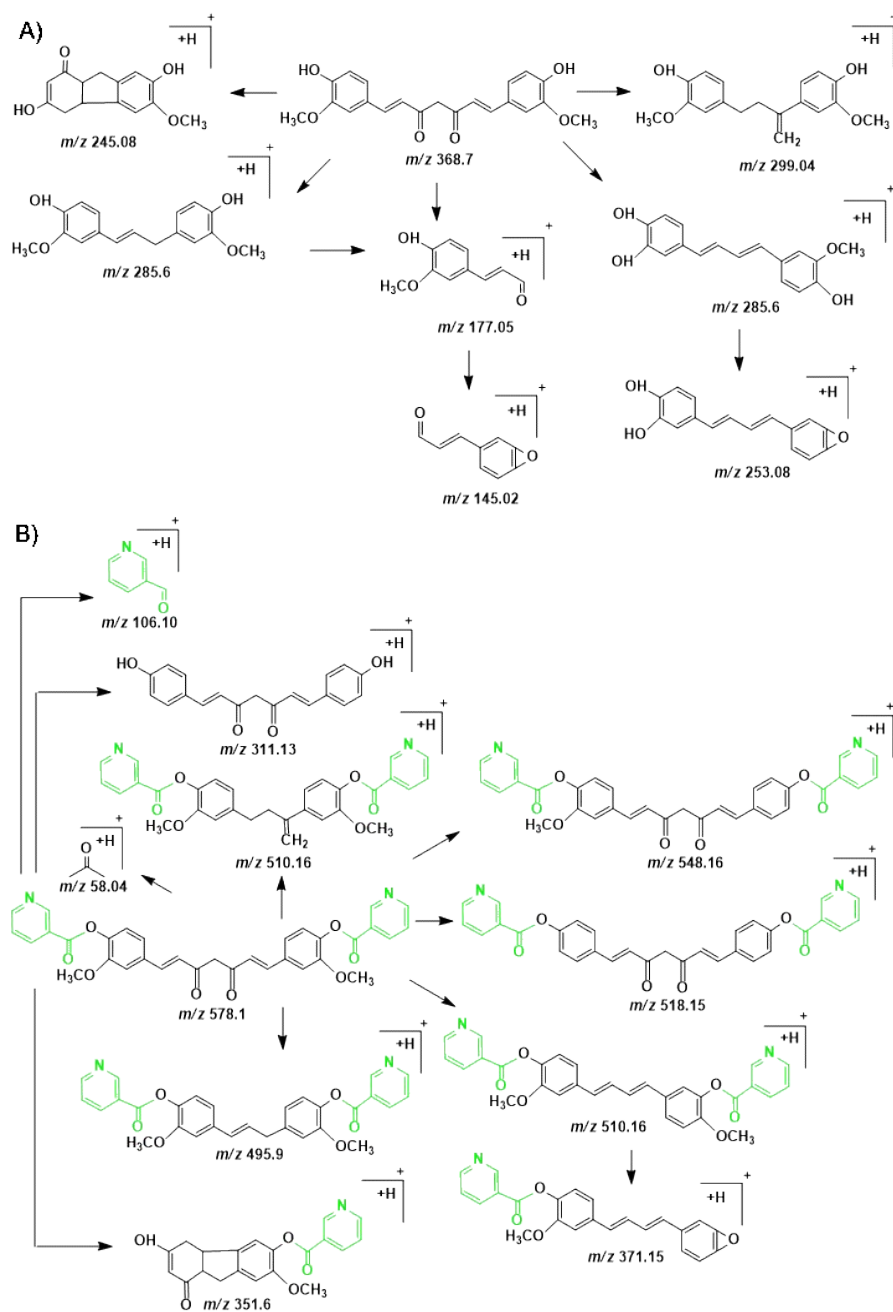

**Scheme S1** Proposed fragmentation pathways of (A) curcumin and (B) Cur-Nic.

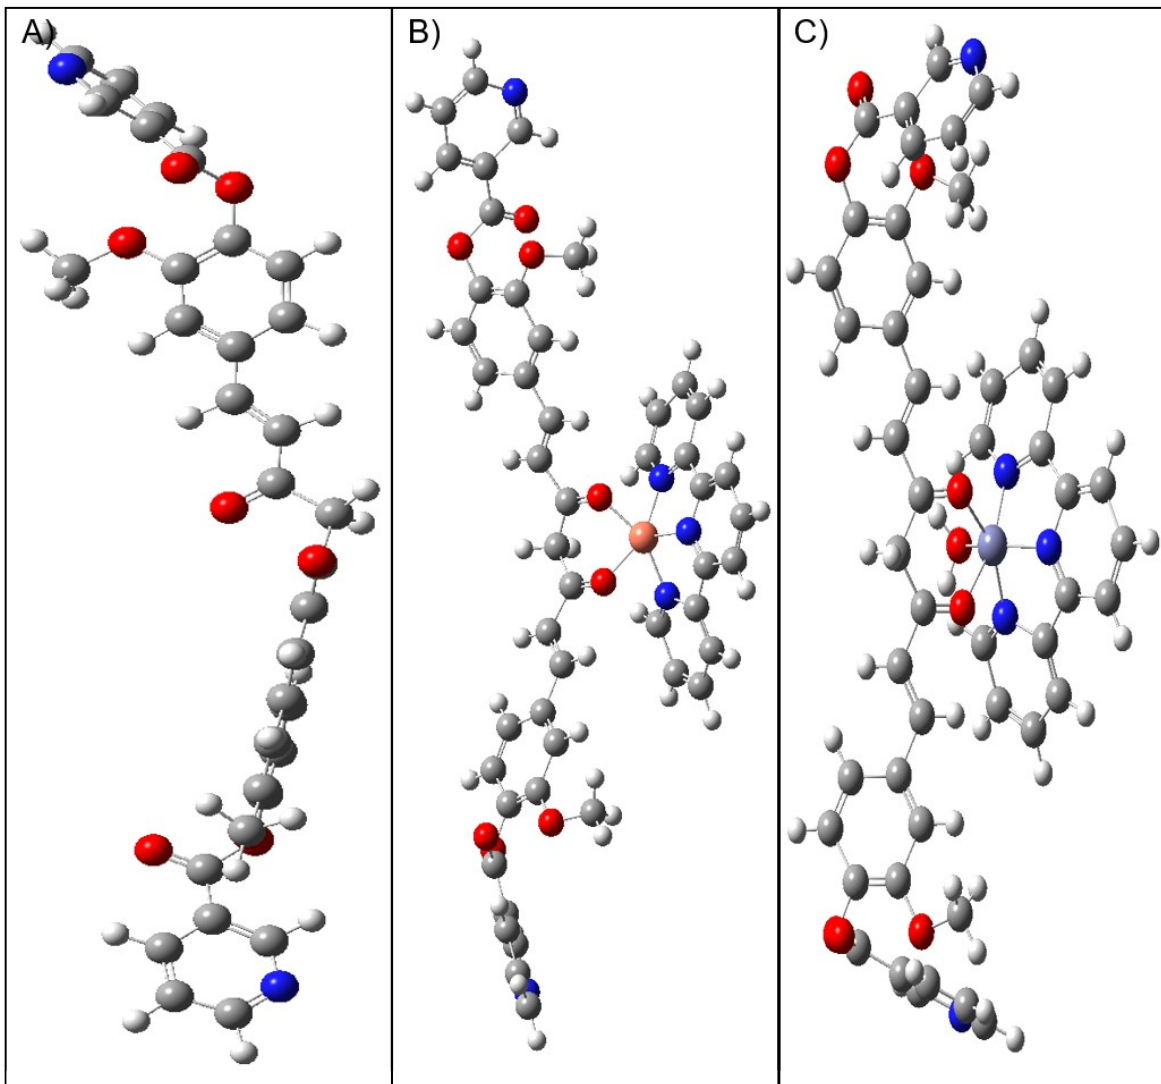

**Fig. S3** optimized structure of (A) Cur-Nic, (B) Cu(II) complex, and (C) Zn(II) complex.
